# Supplementary material
Source: PubMed Central journal article supplement (PMC5070501)
Supplement: supp_2015-0318_Supplemental_Information.pdf [file supp_2015-0318_Supplemental_Information.pdf]

## **Supplemental Information – Lysy et al.**

### **MAFA smRNA drives reprogramming of human pancreatic duct-derived cells into insulin-secreting cells**

Corritore E, Lee YS, Dugnani E, Pasquale V, Hsu MJ, Lombard C, Van Der Smissen P, Vetere A, Bonner-Weir S, Piemonti L, Sokal E, Lysy PA

#### **Supplemental Information inventory:**

**Figure S1** shows EGFP protein expression kinetics after one transfection of  $\beta$ HDDCs using EGFP smRNA. Highest protein expression levels were observed 48-72 hours after transfection.

**Figure S2** shows negligible effects of B18R addition to transfection media on cell viability and absence of transdifferentiation induced in HDDCs by EGFP smRNA transfection and IFN $\alpha$  incubation.

**Figure S3** shows phenotypic changes of HDDCs during differentiation after MAFA overexpression and absence of strong activation of the cellular innate immune response after smRNA transfection. A global decrease of mesenchymal marker expression was observed  $\beta$ -HDDCs.

**Figure S4** shows morphological changes of HDDCs during differentiation after MAFA overexpression.

**Table S1** shows primers used for real-time RT-PCR analysis. This table supports data presented in main Figure 2, Figure 3, Figure 4, Figure 5 and Supplementary Figure 1 and 2.

**Table S2** shows antibodies used for immunostaining. This table supports data presented in main Figure 2, Figure 3, Figure 4, Figure 5, Figure 6, Figure 7 and Supplementary Figures 3 and 5.

**Table S3** describes the estimation of cell ratios in staining assays.

**Figure S1**

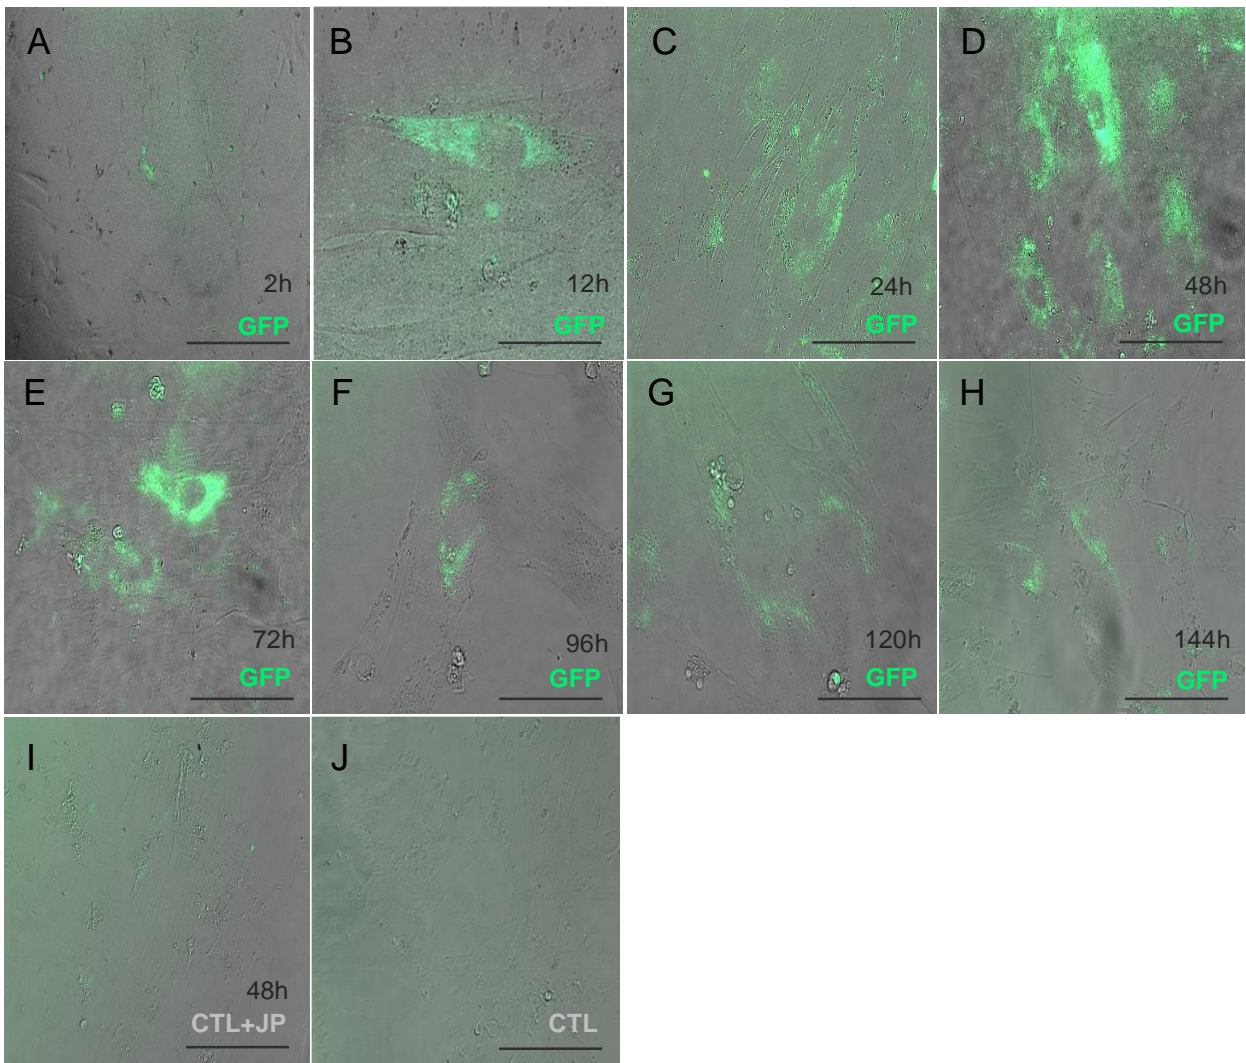

**Figure S1: EGFP protein expression kinetics after single EGFP smRNA transfection**

(A) EGFP protein expression observed 2 hours, (B) 12 hours, (C) 24 hours, (D) 48 hours, (E) 72 hours, (F) 96 hours, (G) 120 hours and (H) 144 hours after single EGFP smRNA transfection on  $\beta$ -HDDCs. (I-J) Fluorescence observed in control groups, 48 hours from the transfection with the JetPEI reagent only (CTL+JP) and in untransfected HDDCs (CTL). These data are representative of three different experiments. Magnification bars: 50  $\mu$ m (A, C-J); 25  $\mu$ m (B).

**Figure S2**

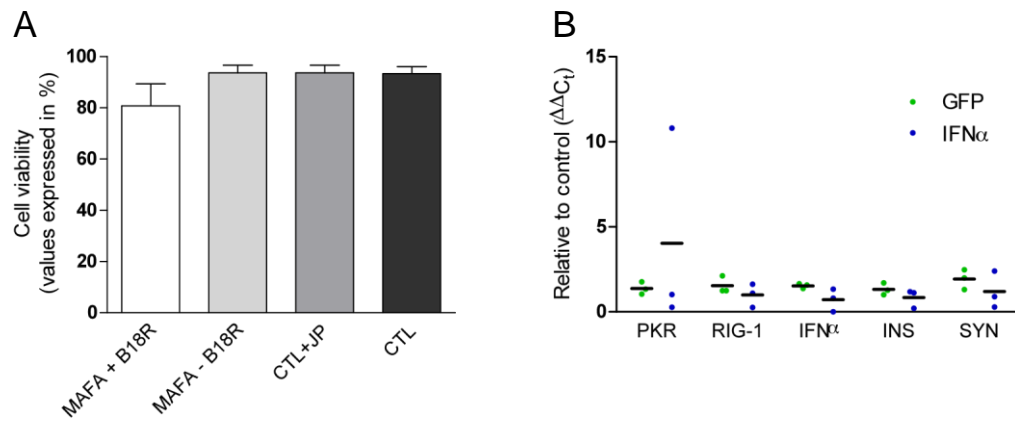

**Figure S2: Additional evidence of the specificity of MAFA smRNA-induced HDDCs differentiation**

(A): The addition of B18R molecule to reprogramming media did not significantly alter cell viability ( $n=3-6$ ). (B): Absence of significant  $\beta$ -cell differentiation of HDDCs after 7 daily consecutive transfections with *EGFP* smRNA or after 72-hour incubation with 200 U/mL IFN $\alpha$  according to insulin and synaptophysin gene expression ( $n=3$ ).

**Figure S3**

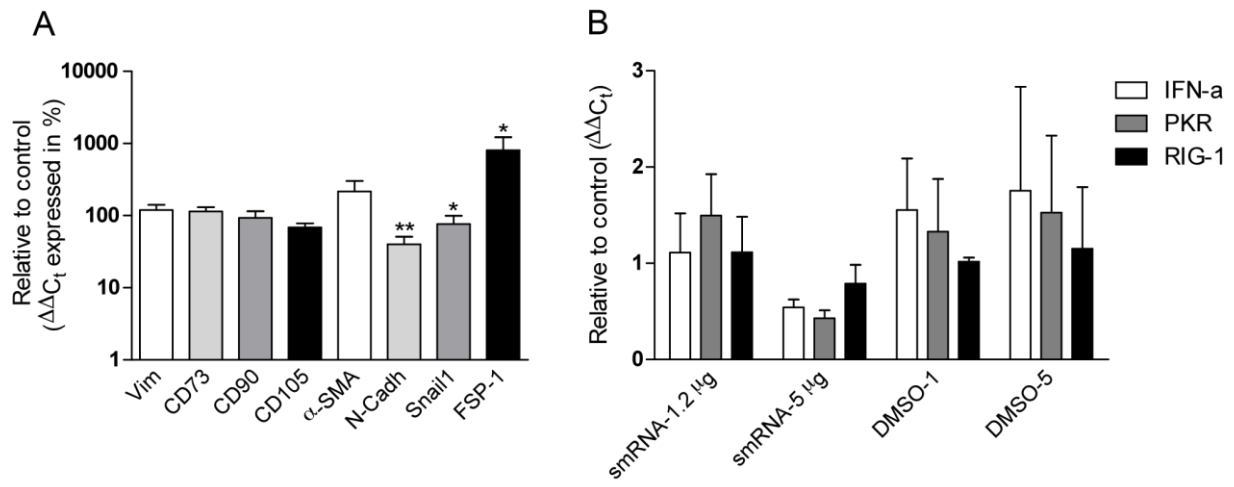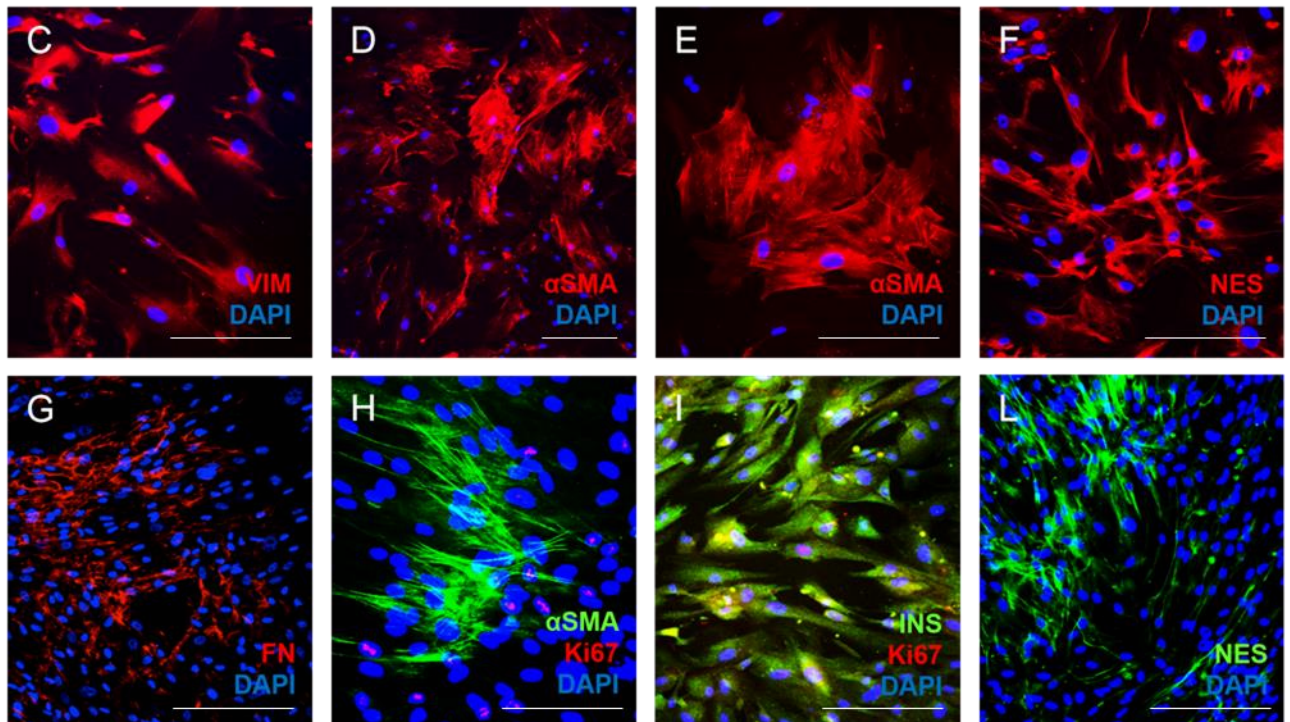

### Figure S3: Additional evidence of HDDC differentiation

(A): After 7 consecutive transfections with MAFA smRNA, HDDCs showed downregulation of EMT transcripts (*i.e.*, *N-cadherin*, *Snail1*), maintenance of mesenchymal transcripts (*i.e.*, *vimentin*, *CD73/90/105*,  $\alpha$ -SMA) and upregulation of FSP-1 gene expression ( $n=3-4$ ). (\*\*)  $P<0.01$  and (\*)  $P<0.05$  compared to control condition. (B): Quantitative real-time PCR shows no significant differences in *IFN $\alpha$* , *PKR* and *RIG-1* gene expression levels between HDDCs transfected with 1.2 or 5  $\mu$ g of smRNA and HDDCs treated with 1-5 % of DMSO ( $n=3$ ). (C-L):  $\beta$ -HDDCs decreased their protein expression of  $\alpha$ SMA, fibronectin, and nestin mesenchymal markers (G-H, L) as compared to undifferentiated HDDCs (C-F), with a complete loss of vimentin expression (data not shown). (I): About 50% of insulin<sup>+</sup>  $\beta$ -HDDCs showed co-expression with Ki67, confirming cell proliferation in these cells during MAFA-induced endocrine reprogramming. Staining data are representative of three independent experiments. Magnification bars: 200  $\mu$ m (C-G, I, L), 100  $\mu$ m (H).

Figure S4

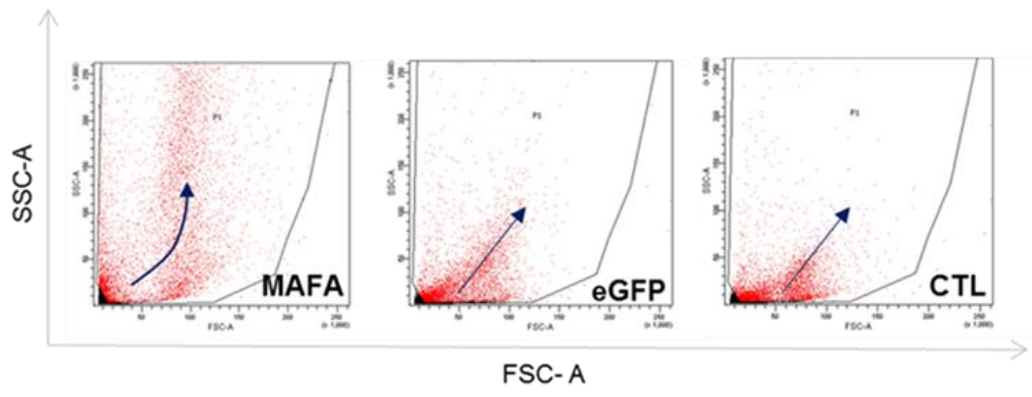



**Figure S4: Morphological and phenotypic changes of MAFA-differentiated HDDCs**

Flow cytometry data showing an increased cell size and cytoplasmic granularity on HDDCs after MAFA overexpression as compared to EGFP-transfected HDDCs and control conditions ( $n=3$ ).

**Table S1: Primers for real-time RT-PCR analysis**

| <b>Transcript</b>      | <b>Forward Primer</b>            | <b>Reverse Primer</b>     |
|------------------------|----------------------------------|---------------------------|
| TBP                    | CCGCCGGCTGTTAACTTC               | GCTGGGTCACTGCAAAGATCA     |
| MAFA (exo)             | TCAACGACTTCGACCTGATG             | GGTTGAGGTGATGCTGGTAG      |
| NGN3 (exo)             | TCGGAAGACGAAGTGACCTG             | GTACAAGCTGTCGTGGTCCGCTATG |
| PDX1 (exo)             | CGCAGCTTTACAAGGACCCAT            | ATCTTGATGTGTCTCTCGGTC     |
| PKR                    | TCGCTGGTATCACTCGTCTG             | GATTCTGAAGACCGCCAGAG      |
| IFN $\alpha$           | ACCCACAGCCTGGATAACAG             | ACTGGTTGCCATCAAACCTCC     |
| RIG-1                  | GTTGTCCCCATGCTGTTCTT             | GCAAGTCTTACATGGCAGCA      |
| Insulin                | GCAGCCTTTGTGAACCAACA             | TTCCCCGCACACTAGGTAGAGA    |
| Synaptophysin          | ACTCCTCGTCAGCCGAATTCT            | GCCCCCATGGAGTAGAGGAA      |
| NeuroD                 | CAAGGTGGTGCCTTGCTATTC            | GCGCAGAGTCTCGATTTTGG      |
| NKX2.2                 | GGAGCGCCACGAATTGAC               | TTCGAGACCCCAAATTTATGTC    |
| GATA4                  | AATTGGGATTTTCCGGAGTAAAC          | CGTATTAATCCAGCATTGAGCAA   |
| PAX6                   | CAGACACAGCCCTCACAAACAC           | AGGTTATTTGCCATGGTGAAGCT   |
| Glucokinase            | GAAGCCCCCACCTTTCTC               | CCTGAGTGAGCAACTCCCTTCT    |
| GLUT-2                 | TTTTTCAGACGGCTGGTATCAG           | CCATGTTTACAGCGCCAACTC     |
| FOXA2                  | TTCAGGCCCGGCTAACTCT              | ACCCCACTTGCTCTCTCACT      |
| MAFA (endo)            | GCCATCGAGTACGTCAACGA             | CGGGAGGCTCCTTCTTCAC       |
| NGN3 (endo)            | GCTGCTCATCGCTCTATTCTT            | CGAGGGTTGAGGCGTCAT        |
| PDX1 (endo)            | TTTCTATTTAGGATGTGGACGTAATT<br>CC | GGCCACTGTGCTTGTCTTCA      |
| NKX6.1                 | ACCCCTCATCAAGGATCCATT            | TGGGTCTCGTGTGTTTTCTCTTC   |
| Pc                     | AGAAGTGGTCCGCAAGATGG             | GTAATTCTCCTCCAGCTCCT      |
| Prlr                   | CTCCACCTACCCTGATTG               | CTCCATGCACTCCAGTATCC      |
| Glucagon               | CAAGGCAGCTGGCAACGT               | CTGGTGAATGTGCCCTGTGA      |
| Somatostatin           | CAACCAGACGGAGAATGATG             | CAGCCAGCTTTGCGTTCT        |
| Pancreatic polypeptide | AGAGCAGATGGCCCAGTATG             | CTGCTCATGGAGTCGTAGGA      |
| Vimentin               | GCAGGCTCAGATTCAGGAACA            | GTGAGGTCAGGCTTGGAACA      |
| N-cadherin             | TGGGAATCCGACGAATGG               | GCAGATCGGACCGGATACTG      |
| $\alpha$ -SMA          | CCTCCTCCCTGGAAAAGAGCTA           | TCGTTGCCGATGGTGATG        |
| FSP-1                  | GCTTGACACGCTGTTGCTA              | GAGGGCACGCCATGACA         |
| CD73                   | CACTGGGACATTCGGGTTTT             | CGTCCACACCCCTCACTTTC      |
| CD90                   | CGAACCAACTTCACCAGCAAAT           | CCTTGCTAGTGAAGGCGGATA     |
| CD105                  | CCGCGCTTCAGCTTCCT                | GAGGGTGCCGGTTTTGG         |
| Snail1                 | GTTTCCCGGGCAATTTAACA             | CCCGACAAGTGACAGCCATT      |

**Table S2: Antibodies for immunostaining**

| <b>Primary Antibodies (Immunohistochemistry)</b>   |                  |                 |                                 |
|----------------------------------------------------|------------------|-----------------|---------------------------------|
| <b>Antigen</b>                                     | <b>Species</b>   | <b>Dilution</b> | <b>Source</b>                   |
| PKR                                                | Rabbit           | 1:200           | Abcam                           |
| Insulin                                            | Guinea Pig       | 1:100           | Dako                            |
| Insulin                                            | Rabbit           | 1:50            | Santa Cruz                      |
| MAFA                                               | Rabbit           | 1:100           | Abcam                           |
| MAFA                                               | Goat             | 1:50            | Santa Cruz                      |
| PDX1                                               | Goat             | 1:6             | R&D systems                     |
| GLUT-2                                             | Rabbit           | 1:100           | Abcam                           |
| Somatostatin                                       | Rabbit           | 1:200           | Vision Biosystems<br>Novocastra |
| Pancreatic polypeptide                             | Rabbit           | 1:200           | Vision Biosystems<br>Novocastra |
| Glucagon                                           | Rabbit           | 1:50            | Vision Biosystems<br>Novocastra |
| <b>Secondary Antibodies (Immunohistochemistry)</b> |                  |                 |                                 |
| <b>Target</b>                                      | <b>Conjugate</b> | <b>Dilution</b> | <b>Source</b>                   |
| Guinea-Pig                                         | Biotin           | 1:400           | Jackson<br>ImmunoResearch       |
| Biotin                                             | AF488            | 1:200           | Molecular Probes                |
| Rabbit                                             | Alexa594         | 1:200           | Jackson<br>ImmunoResearch       |
| Goat                                               | FITC             | 1:200           | Jackson<br>ImmunoResearch       |

**Table S3****Number of insulin positive cells after *in vitro* differentiation**

---

| <u>Donor</u> | <u>Conditions</u> | <u>Random fields</u> | <u>Cells counted</u>  |
|--------------|-------------------|----------------------|-----------------------|
| Hp1111       | Control group     | 6                    | 7723 (total cells)    |
| Hp1116       | MAFA group        | 6                    | 2564 (positive cells) |
| Hp1117       |                   |                      |                       |
| Hp1          |                   |                      |                       |
| Hp2          |                   |                      |                       |

**Number of MAFA positive cells after *in vitro* differentiation**

---

| <u>Donor</u> | <u>Conditions</u> | <u>Random fields</u> | <u>Cells counted</u>  |
|--------------|-------------------|----------------------|-----------------------|
| Hp1111       | Control group     | 6                    | 5138 (total cells)    |
| Hp1116       | MAFA group        | 6                    | 1762 (positive cells) |
| Hp1117       |                   |                      |                       |
| Hp1          |                   |                      |                       |
| Hp2          |                   |                      |                       |

**Number of PKR positive cells after *in vitro* differentiation**

---

| <u>Donor</u> | <u>Conditions</u> | <u>Random fields</u> | <u>Cells counted</u>  |
|--------------|-------------------|----------------------|-----------------------|
| Hp1116       | Control group     | 4                    | 6040 (total cells)    |
| Hp1117       | MAFA group        | 4                    | 2669 (positive cells) |
| Hp1          |                   |                      |                       |

**Number of EGFP positive cells after *in vitro* differentiation**

---

| <u>Donor</u> | <u>Conditions</u> | <u>Random fields</u> | <u>Cells counted</u>  |
|--------------|-------------------|----------------------|-----------------------|
| Hp1080       | Control group     | 4                    | 4701 (total cells)    |
| Hp1116       | MAFA group        | 5                    | 2218 (positive cells) |
| Hp2          |                   |                      |                       |
